# Supplementary material for: Comparative genomics of closely related Salmonella enterica serovar Typhi strains reveals genome dynamics and the acquisition of novel pathogenic elements
Source: PubMed Central journal article supplement (PMC4289253; doi:10.1186/1471-2164-15-1007), 2014-11-20
Supplement: 12864_2013_6828_MOESM2_ESM.pdf [file 12864_2013_6828_MOESM2_ESM.pdf]

Pulsed-Field Gel Electrophoresis of *S. Typhi* Strains (BL196, CR0044, ST0208)

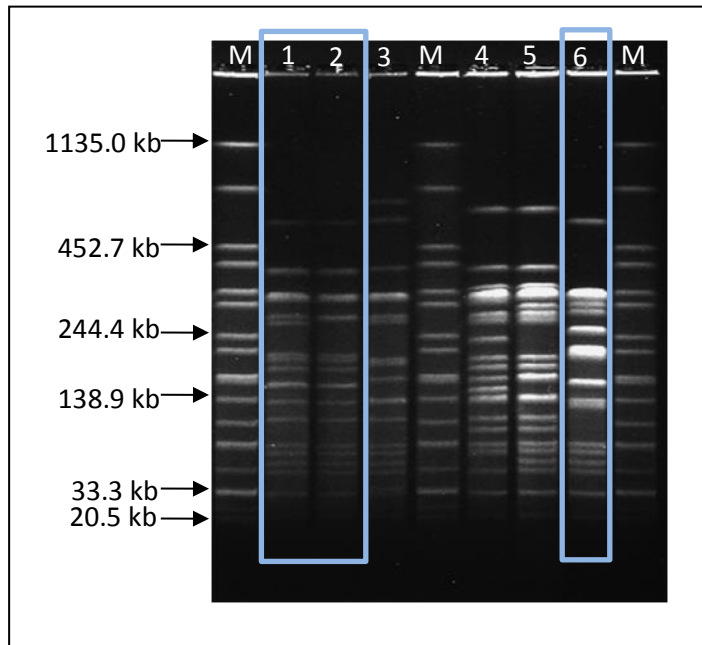

Additional file 2. Pulsed-Field Gel Electrophoresis (PFGE) pattern of *Salmonella Typhi* following digestion with *Xba*I. M = *Salmonella* Braenderup H9812 markers; Lane 1= BL196; Lane 2= CR0044; Lane 3= CR0063; Lane 4= UJ308A; Lane 5= UJ816A; Lane 6= ST0208. Values on the left (in kilobase pairs) refers to the position of marker bands.
