# Supplementary material for: Comparative genomics of closely related Salmonella enterica serovar Typhi strains reveals genome dynamics and the acquisition of novel pathogenic elements
Source: PubMed Central journal article supplement (PMC4289253; doi:10.1186/1471-2164-15-1007), 2014-11-20
Supplement: 12864_2013_6828_MOESM4_ESM.pdf [file 12864_2013_6828_MOESM4_ESM.pdf]

Additional file 4: The representative gel picture of *zot* prevalence in *S. Typhi*.

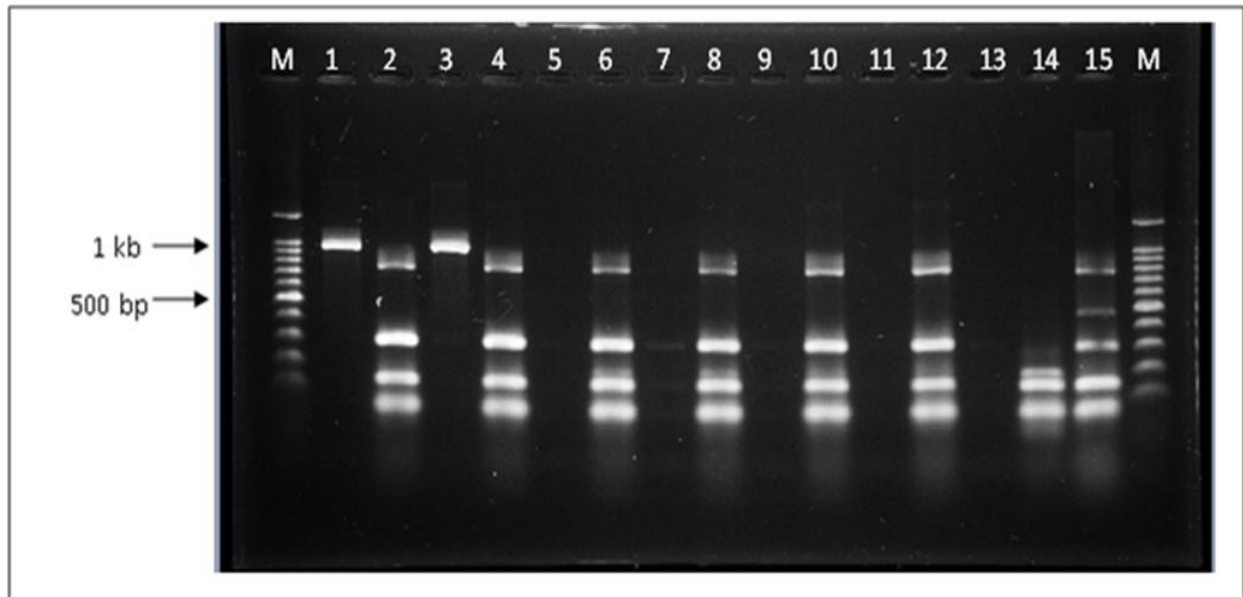

Additional file 4: The representative 1.5 % gel electrophoresis picture of *zot* prevalence screening using *zot* PCR detection coupled with in-house *S. Typhi* detection multiplex PCR. Lane M= 100 bp Markers, Lane 1= *zot* presence for BL196; Lane 2 = BL196; Lane 3= *zot* detected for CR0044 ; Lane 4= CR0044; Lane 5= *zot* was not detected for ST0208; Lane 6= ST0208; Lane 7, 9, 11= *zot* was not detected for other *S. Typhi* strains tested; Lane 8, 10, 12= other *S. Typhi* strains tested; Lane 13= Negative control for *zot*; Lane 14= negative control for in-house *S. Typhi* detection multiplex PCR; Lane 15 = Positive control (187 bp: internal amplification control; 332 bp: *S. Typhi*; 496 bp: *S. Paratyphi A*; 784: *Salmonella enterica*). Amplicon size of 1026 bp correspond to *zot* detected in BL196 and CR0044.
